# Supplementary material
Source: PubMed Central journal article supplement (PMC4406104)
Supplement: IOVS-14-15630-s03.pdf [file IOVS-14-15630-s03.pdf]

1 **Supplemental Fig. 1: Activated phenotype expressed by corneal infiltrating CD4<sup>+</sup> T cells.** Donor T cells  
2 from B6-congeneic CD90.1 (Thy1.1) were transplanted with bone marrow from B6-CD90.2 donors. Infiltrating  
3 cells were obtained (see Methods) from the corneas of recipient animals undergoing GVHD 1 month post-  
4 transplant. Cells were stained with anti-Th1.1 mAb to identify transplanted donor T cells. CD4 T cells were  
5 stained with anti-CD44 and anti-CD62L mabs and phenotype indicates an activated state. Histograms at far  
6 right represent staining of normal CD4 lymph node T cells from age matched non-transplanted animals.

7  
8 **Supplemental Fig. 2: Lacrimal gland fibrosis in animals with ocular graft versus host disease.**  
9 Photographs of lacrimal gland tissue from section (7um) stained with Masson's trichrome stain at 20X  
10 magnification. Collagen and connective tissue are stained blue. Fibrin and muscle are stained in red.  
11 Periductal fibrosis is observed in the lacrimal glands of animals undergoing GVHD.
