# Supplementary material
Source: PubMed Central journal article supplement (PMC4406104)

Supplemental Figure 1  
Herretes, et. al.

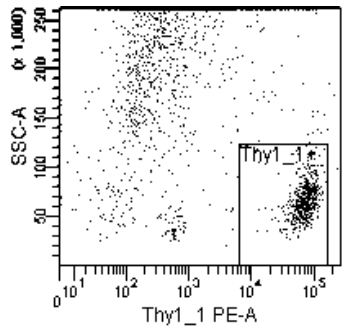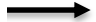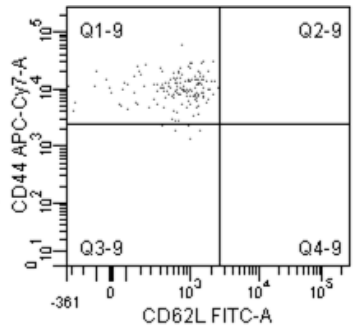

CD4

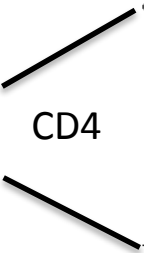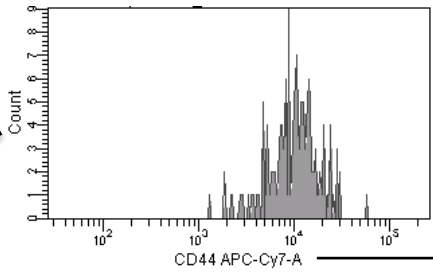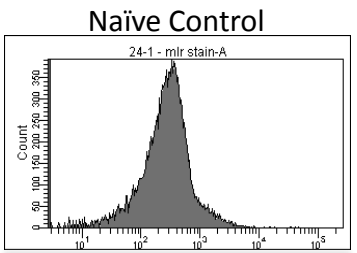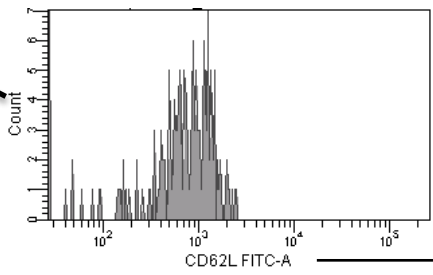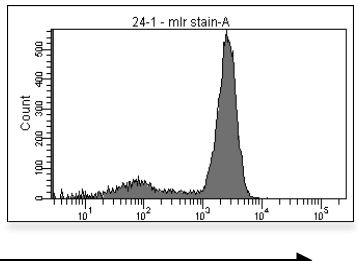

Supplement: IOVS-14-15630-s01.pdf [file IOVS-14-15630-s01.pdf]

TCD-BM

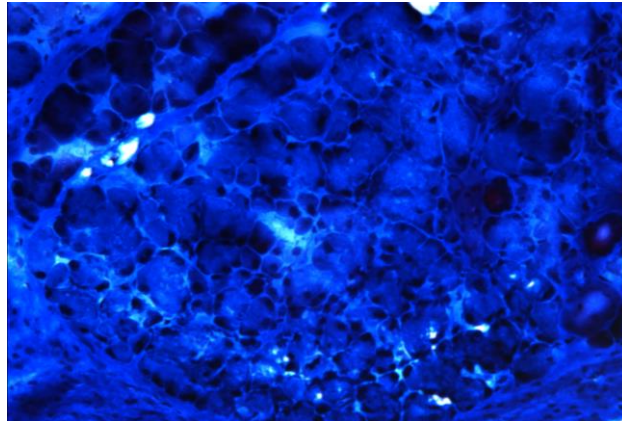

TCD-BM  
+  
T cells

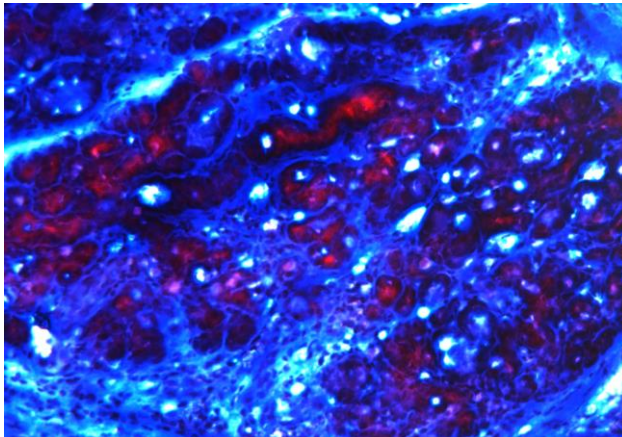

Supplement: IOVS-14-15630-s02.pdf [file IOVS-14-15630-s02.pdf]
